# Supplementary material for: A Simple and Efficient Strategy for Preparation of Flexible Strain Sensors Based on Marangoni Effect
Source: MDPI journal article supplement (doi:10.3390/coatings13061101), 2023-06-15
Supplement: s1 [file s1]

Archive with 1 entries (1 files):
- coatings-2386938-supplementary.pdf
