# Supplementary material for: A Simple and Efficient Strategy for Preparation of Flexible Strain Sensors Based on Marangoni Effect
Source: MDPI journal article supplement (doi:10.3390/coatings13061101), 2023-06-15
Supplement: s1 [file s1 › coatings-2386938-supplementary.pdf]

# A Simple and Efficient Strategy for Preparation of Flexible Strain Sensors Based on Marangoni Effect

Xuqiu Bai <sup>1</sup>, Zhichun Xu <sup>1</sup>, Xianyi Li <sup>1</sup>, Tiantian Zhao <sup>1</sup>, Xiang Ge <sup>2,\*</sup> and Caideng Yuan <sup>1,3,\*</sup>

<sup>1</sup> School of Chemical Engineering and Technology, Tianjin University, Tianjin 300350, China; baixuqiu@tju.edu.cn (X.B.); 2021207592@tju.edu.cn (Z.X.); 2032822687@qq.com (X.L.); 3017207113@tju.edu.cn (T.Z.); cdyuan@tju.edu.cn (C.Y.)

<sup>2</sup> School of Mechanical Engineering, Tianjin University, Tianjin 300350, China; gexiang.hkust@gmail.com (X.G.)

<sup>3</sup> Guangdong Laboratory of Chemistry and Fine Chemical Industry Jieyang Center, Jieyang 522000, China; cdyuan@tju.edu.cn (C.Y.)

\* Correspondence: cdyuan@tju.edu.cn (C.Y.); gexiang.hkust@gmail.com (X.G.)

## 1. SEM images of carbon materials

CNTs and GN were characterized by SEM and the results were shown in Figure S1.

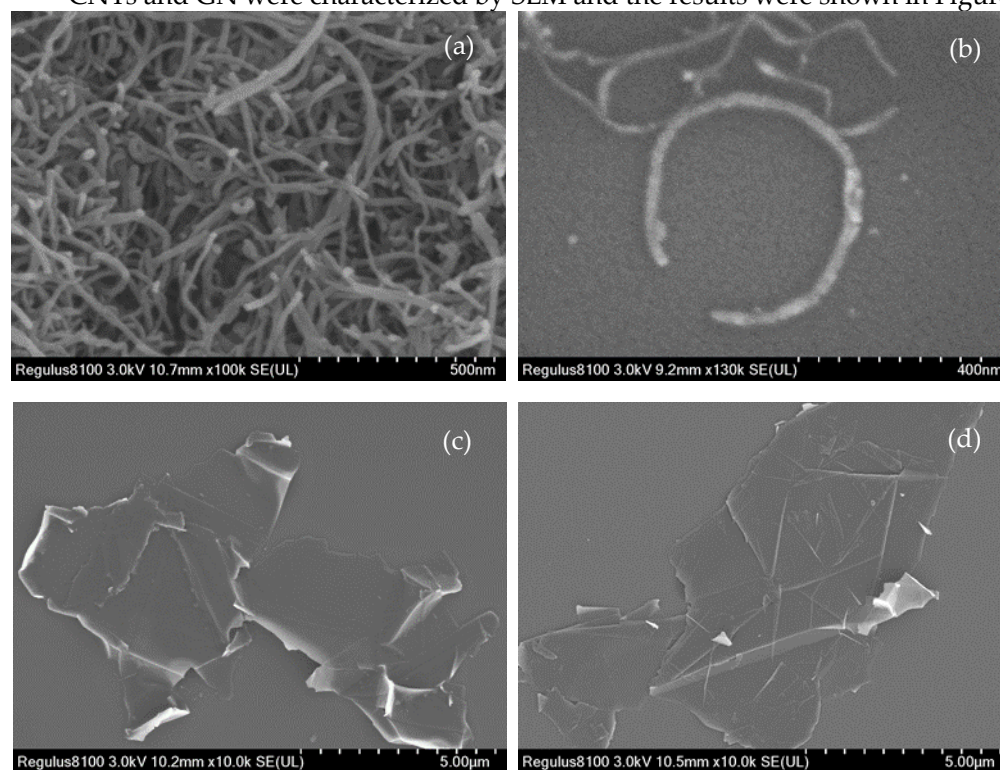

**Figure S1.** SEM images of (a,b) CNTs and (c,d) GN.

**Citation:** To be added by editorial staff during production.

Academic Editor: Firstname Last-name

Received: date

Revised: date

Accepted: date

Published: date

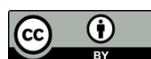

**Copyright:** © 2023 by the authors. Submitted for possible open access publication under the terms and conditions of the Creative Commons Attribution (CC BY) license (<https://creativecommons.org/licenses/by/4.0/>).

## 2. SEM images of Marangoni self-assembled films

SEM images of Marangoni self-assembled films made by different proportions of CNTs and GN are shown in Figure S2. And SEM images of Marangoni self-assembled films with different volumes of 50% CNTs/ethanol dispersion are exhibited in Figure S3.

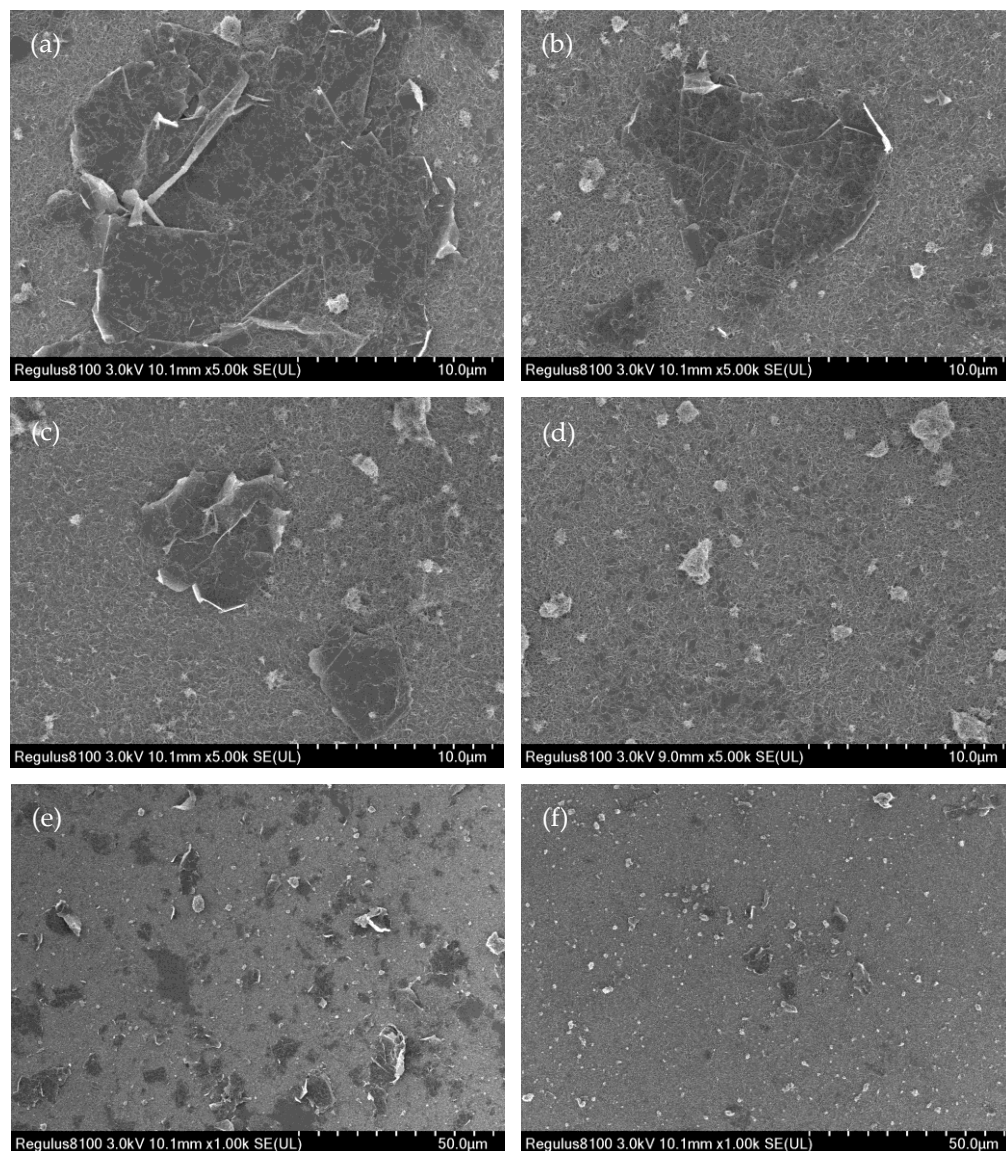

**Figure S2.** SEM images of Marangoni self-assembled conductive films made by different proportions of CNTs and GN. (a) 25% CNTs, (b) 50% CNTs, (c) 75% CNTs, (d) 100% CNTs, magnified 5k (e) 25% CNTs and (f) 75% CNTs, magnified 1 k.

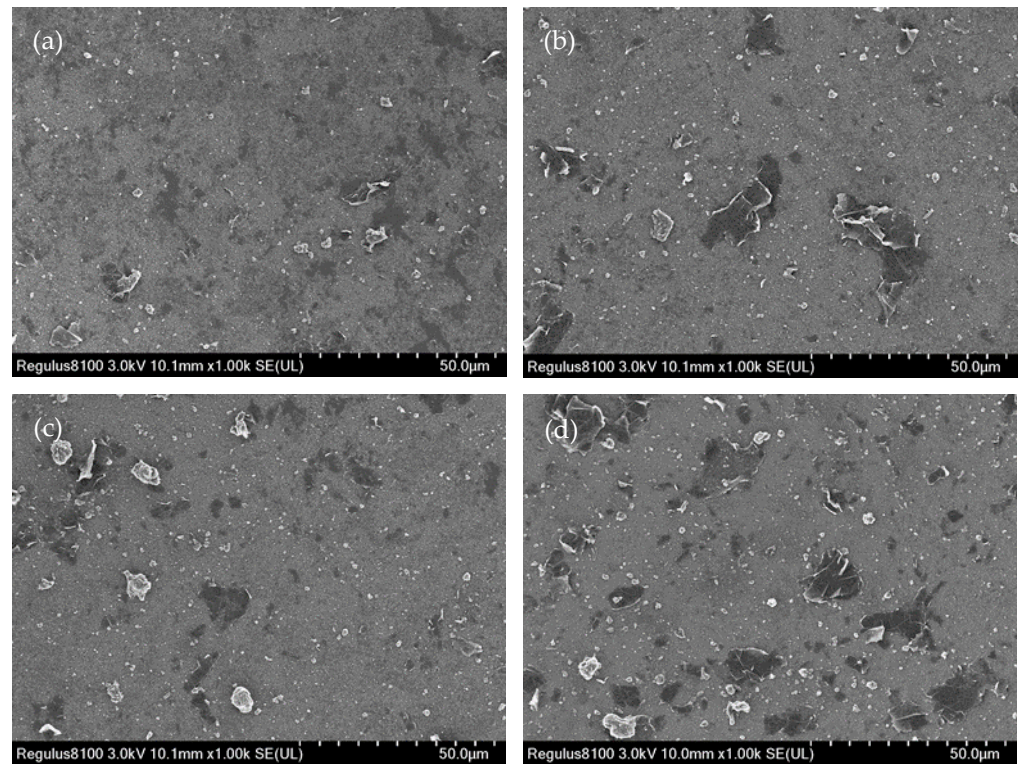

**Figure S3.** SEM images of Marangoni self-assembled conductive films made by different volumes of 50% CNTs/ethanol dispersion (a) 0.3 mL, (b) 0.4 mL, (c) 0.5 mL, (d) 0.6 mL, magnified 1 k.

### 3. SEM images of Marangoni self-assembled films based on 3M4910 after stretching and recovery repeatedly

After several times of stretching and recovery, the change of conductive film was observed, as what we can see in Figure S4.

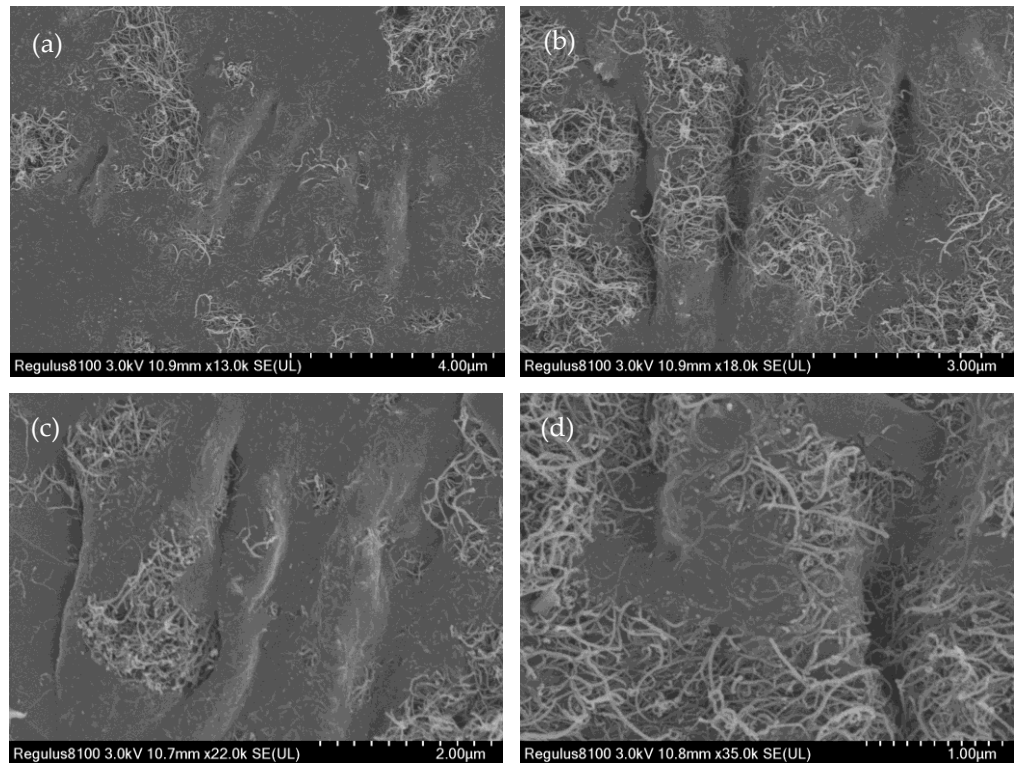

**Figure S4.** The SEM images of Marangoni self-assembled films based on 3M4910 after stretching and recovery repeatedly with the strain of 30%.
